# Supplementary material for: Over-Inflating a Tracheostomy Tube Cuff for Tracheo-Innominate Artery Fistula
Source: MDPI journal article supplement (doi:10.3390/diagnostics14020223), 2024-01-20
Supplement: s1 [file s1]

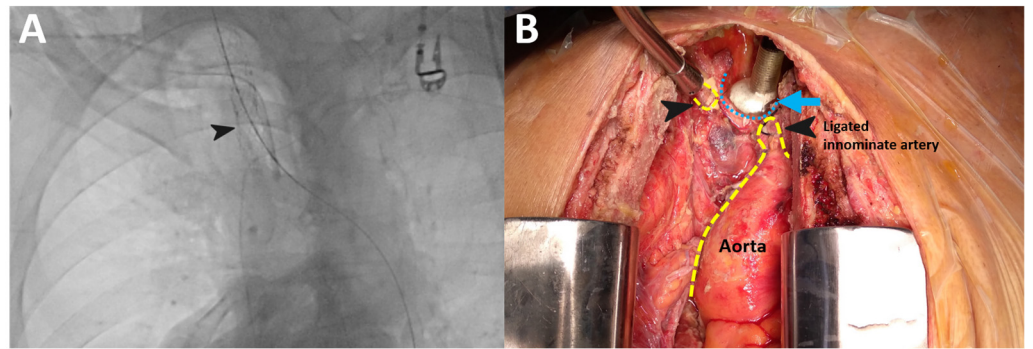

**Figure S1.** Angiography and intraoperative picture of surgical procedure. (A) Endovascular stent (arrowhead). (B) Ligated right innominate artery stumps (black dashed lines and arrowheads); a tracheostomy tube cuff (blue arrow) causes erosion of the trachea (blue dotted line).
